# Supplementary material for: First WNK4-Hypokalemia Animal Model Identified by Genome-Wide Association in Burmese Cats
Source: PubMed Central journal article supplement (PMC3532348; doi:10.1371/journal.pone.0053173), 2012-12-28
Supplement: pone.0053173.s004.pdf [file pone.0053173.s004.pdf]

|          |   |   |   |   |   |   |   |   |   |   |   |   |   |   |   |   |   |   |   |   |   |   |   |   |   |   |   |   |   |   |   |   |   |   |   |   |   |   |
|----------|---|---|---|---|---|---|---|---|---|---|---|---|---|---|---|---|---|---|---|---|---|---|---|---|---|---|---|---|---|---|---|---|---|---|---|---|---|---|
| 71066532 | A | M | G | G | A | G | G | G | A | C | G | G | A | A | A | A | G | A | G | A | A | A | C | C | A | A | A | A | A | G | G | G | C | G | A | A | G | G |
| 71099252 | A | A | G | G | A | G | G | G | R | A | C | R | R | R | R | M | G | A | R | A | A | A | C | A | A | R | R | 0 | G | G | C | R | A | G | G | A | G |   |
| 71247874 | A | A | G | G | A | G | G | G | G | A | C | G | G | A | A | A | G | G | G | A | A | A | A | C | A | A | A | G | G | G | C | A | A | G | G | A | G |   |
| 71277055 | A | A | G | G | A | G | G | G | G | A | C | G | G | A | A | A | G | G | R | A | A | A | A | C | C | A | A | A | R | G | G | M | R | A | R | G | A |   |
| 71353469 | A | A | G | G | A | G | G | R | A | M | G | R | A | R | R | M | G | A | R | R | A | R | C | 0 | A | A | A | A | G | G | C | G | A | R | G | A | G |   |
| 71403978 | A | 0 | G | G | A | G | G | R | G | A | C | G | R | A | R | 0 | M | G | G | 0 | A | A | A | C | 0 | A | A | R | 0 | G | G | C | R | A | R | 0 | A |   |
| 71457582 | A | A | G | G | A | G | G | G | G | A | C | G | G | A | A | A | G | A | R | G | A | A | C | A | A | A | G | G | G | C | A | A | G | G | A | G |   |   |
| 71521560 | A | A | G | G | A | G | G | G | G | A | C | G | G | A | A | A | G | A | G | A | A | A | A | C | C | A | A | A | A | G | G | C | G | A | R | G | A |   |
| 71595268 | A | A | G | G | A | G | R | G | A | M | G | R | R | R | R | M | G | G | R | A | A | R | C | M | A | A | A | R | G | G | M | G | A | R | G | A | G |   |
| 71633461 | A | C | G | G | A | G | G | G | G | A | C | G | G | A | A | A | G | A | G | A | A | A | A | C | A | A | A | G | G | C | A | A | G | G | A | G | A |   |
| 71759617 | A | A | G | R | A | G | G | R | A | C | 0 | R | R | R | R | M | G | A | 0 | A | A | A | C | M | A | A | R | 0 | G | G | C | 0 | A | R | G | A | G |   |
| 71786668 | A | A | G | G | A | G | G | G | G | A | C | G | G | A | A | A | G | A | G | A | A | A | A | C | M | A | A | R | 0 | G | G | C | R | A | R | G | A |   |
| 72041690 | A | A | G | G | A | G | G | G | G | A | C | G | G | A | A | A | G | A | G | A | A | A | A | C | A | A | A | G | G | C | A | A | G | G | A | G |   |   |
| 72164217 | A | A | G | G | A | G | G | G | A | C | G | G | A | A | A | A | G | A | G | A | A | A | A | C | A | A | A | G | G | C | A | A | G | G | A | G |   |   |
| 72389003 | A | A | G | G | A | G | G | G | A | C | G | G | A | A | A | A | G | A | G | A | A | A | A | C | A | A | A | G | G | C | A | A | G | G | A | G |   |   |
| 72487363 | A | A | G | G | A | G | G | G | A | C | G | G | A | A | A | A | G | A | G | A | A | A | A | C | A | A | A | G | G | C | A | A | G | G | A | G |   |   |
| 72766402 | A | A | G | G | A | G | G | G | A | C | G | G | A | A | A | A | G | A | G | A | A | A | A | C | A | A | A | G | G | C | A | A | G | G | A | G |   |   |
| 72805462 | A | A | G | G | A | G | G | G | A | C | G | G | A | A | A | A | G | A | G | A | A | A | A | C | M | A | R | A | A | G | G | C | G | A | R | G | A |   |
| 72965036 | A | A | G | G | A | G | R | G | A | C | G | G | A | R | R | M | R | G | R | A | A | A | R | C | A | A | A | G | G | C | A | A | G | R | A | G | A |   |
| 73054644 | A | A | G | G | A | G | G | G | A | C | G | G | A | A | A | A | G | A | R | A | A | A | C | A | A | A | A | G | G | C | A | A | G | G | A | G |   |   |
| 73297940 | A | A | G | G | A | G | G | G | A | C | G | G | A | A | A | A | G | A | G | A | A | A | A | C | A | A | A | G | G | C | A | A | G | G | A | G |   |   |
| 73524573 | A | A | G | G | A | G | G | G | A | C | G | G | A | A | A | A | G | A | G | A | A | A | A | C | A | A | A | G | G | C | A | A | G | G | A | G |   |   |
| 73585707 | A | A | G | G | A | G | G | G | A | C | G | G | A | A | A | A | G | A | R | A | A | A | M | A | A | A | A | G | G | C | A | A | G | G | A | G |   |   |
| 73737447 | A | A | G | G | A | G | G | G | A | C | G | G | A | A | A | A | G | A | R | A | A | A | C | A | A | A | R | G | G | C | A | A | G | G | A | G |   |   |
| 73929199 | A | A | G | G | A | G | G | G | A | C | G | G | A | A | A | A | G | A | G | A | A | A | C | C | A | A | A | A | G | G | C | A | A | G | G | A | G |   |
| 74188118 | A | A | G | G | A | G | R | G | A | M | G | R | R | R | R | M | G | G | R | A | A | R | C | A | A | A | R | 0 | G | G | C | A | R | R | R | R | A |   |
| 74256133 | A | A | G | G | A | G | G | G | A | C | G | G | A | A | A | A | G | A | G | A | A | A | C | A | A | G | G | G | C | A | A | G | G | A | G | A | G |   |
| 74507499 | A | A | G | G | A | G | G | G | A | C | G | G | A | A | A | A | G | A | G | A | A | A | C | A | A | A | A | G | G | C | A | A | G | G | A | G | A |   |
| 74531671 | A | A | G | G | A | G | G | G | A | C | G | G | A | A | A | A | G | A | G | A | A | A | C | M | A | R | A | A | G | G | C | G | A | A | G | R | A |   |
| 74640629 | A | A | G | G | A | G | G | G | A | C | G | G | A | A | A | A | G | A | G | A | A | A | C | A | R | A | A | G | G | C | G | A | A | G | R | A | G |   |
| 74706742 | A | A | G | G | A | G | R | G | A | C | G | G | A | R | R | M | R | G | R | A | A | R | C | A | A | A | R | G | G | C | A | A | G | R | R | A | G |   |
| 74766200 | A | A | G | G | A | G | G | G | A | C | G | G | A | A | A | A | G | A | G | A | A | A | C | A | A | A | A | G | G | C | A | A | G | R | A | G | A |   |
| 74811718 | A | A | G | G | A | G | G | G | A | C | G | G | A | A | A | A | G | A | G | A | A | A | C | A | A | A | A | G | G | C | A | A | G | R | A | G | A |   |
| 74874742 | A | A | G | G | A | G | R | G | A | M | G | R | R | R | R | M | G | G | R | A | A | R | C | A | A | A | R | G | G | C | A | A | G | R | R | A | G |   |
| 74924082 | A | A | G | G | A | G | G | G | A | C | G | G | A | A | A | A | G | A | G | A | A | A | C | C | A | A | A | A | G | G | C | G | A | A | G | R | A |   |
| 74958043 | A | A | G | G | A | G | G | G | A | C | G | G | A | A | A | A | G | A | G | A | A | A | C | M | A | R | A | A | G | G | C | A | A | G | R | A | G |   |

Controls

DSH

Cases

|   |   |   |   |   |   |   |   |   |   |   |   |   |   |   |   |   |   |   |   |   |   |   |   |   |   |   |   |   |   |   |   |   |   |   |   |
|---|---|---|---|---|---|---|---|---|---|---|---|---|---|---|---|---|---|---|---|---|---|---|---|---|---|---|---|---|---|---|---|---|---|---|---|
| A | C | G | G | A | G | G | A | G | A | C | G | A | A | G | G | C | G | G | A | A | A | C | A | A | A | G | G | G | C | A | A | G | G |   |   |
| A | C | G | O | A | G | G | O | R | A | C | O | A | R | G | G | C | G | R | O | A | A | A | C | A | A | A | G | G | G | C | O | A | G | O |   |
| A | O | G | G | A | G | G | R | R | A | C | R | A | R | G | G | C | G | G | A | A | A | A | C | A | A | A | G | G | G | C | A | A | G | G |   |
| A | O | G | G | A | G | G | R | R | A | C | R | A | R | G | G | C | G | G | A | A | A | A | C | A | A | A | G | G | G | C | A | A | G | G |   |
| A | M | G | G | A | G | G | R | G | A | C | G | R | A | R | R | M | G | R | A | A | A | A | C | A | A | A | G | G | G | C | A | A | G | G |   |
| A | A | G | G | A | G | G | G | G | A | C | G | G | A | A | A | A | G | R | R | A | A | A | C | M | A | A | R | O | G | G | C | R | A | G | G |
| A | M | G | G | A | G | G | R | R | A | C | R | A | R | G | G | C | G | G | A | A | A | A | C | A | A | A | G | G | G | C | A | A | G | G |   |
| A | C | G | G | A | G | G | A | G | A | C | G | A | A | G | G | C | G | G | A | A | A | A | C | A | A | A | G | G | G | C | A | A | R | G |   |
| A | O | G | G | A | G | G | R | R | A | C | R | A | R | G | G | C | G | R | A | A | A | A | C | A | A | A | G | G | G | C | A | A | G | R |   |
| A | C | G | G | A | G | G | A | G | A | C | G | A | A | G | G | C | G | G | A | A | A | A | C | A | A | A | G | G | G | C | A | A | G | G |   |
| A | C | G | G | A | G | G | A | G | A | C | G | A | A | G | G | C | G | G | A | A | A | A | C | A | A | A | G | G | G | C | A | A | G | G |   |
| A | M | G | G | A | G | G | R | R | A | C | R | A | R | G | G | C | G | R | A | A | A | A | C | A | A | A | G | G | G | C | A | A | G | R |   |
| A | M | G | G | A | G | G | R | G | A | M | G | R | R | R | R | M | G | R | R | A | A | A | C | A | A | A | G | G | G | C | A | A | G | G |   |
| A | M | G | G | A | G | G | R | G | A | C | G | R | A | R | R | M | G | R | R | A | A | A | C | A | A | A | G | G | G | C | A | A | G | G |   |
| A | C | G | G | A | G | G | A | G | A | C | G | A | A | G | G | C | G | G | A | A | A | A | C | A | A | A | R | R | G | G | C | R | A | R | G |
| A | A | G | G | A | G | G | R | R | A | C | R | R | R | G | G | C | R | R | A | A | A | A | C | A | A | R | R | R | G | G | C | R | A | G | G |
| A | M | G | G | A | G | G | R | R | A | C | R | A | R | G | G | C | G | R | A | A | A | A | C | A | A | A | G | G | G | C | A | A | G | R |   |
| A | A | G | G | A | G | G | G | A | A | C | A | A | G | G | G | C | G | A | A | A | A | A | C | A | A | A | G | G | G | C | A | A | G | R |   |
| A | M | G | G | A | G | G | R | R | A | C | R | A | R | G | G | C | G | R | A | A | A | A | C | A | A | A | G | G | G | C | A | A | G | G |   |
| A | C | G | G | A | G | G | R | G | A | C | G | R | A | R | R | M | G | R | R | A | A | A | C | A | A | A | G | G | G | C | A | A | A | R |   |
| A | M | G | G | A | G | G | R | R | A | C | R | A | R | G | G | C | G | R | A | A | A | A | C | A | A | A | G | G | G | C | A | A | G | R |   |
| A | M | G | G | A | G | G | R | G | A | C | G | R | A | R | R | M | G | R | R | A | A | A | C | A | A | A | G | G | G | C | A | A | R | G |   |
| A | A | G | G | A | G | G | R | R | A | C | R | R | R | G | G | C | R | R | A | A | A | A | C | A | A | R | R | R | G | G | C | R | A | G | G |
| A | M | G | G | A | G | G | R | R | A | C | R | A | R | G | G | C | G | R | A | A | A | A | C | A | A | A | G | G | G | C | A | A | G | R |   |
| A | M | G | G | A | G | G | R | R | A | C | R | A | R | G | G | C | G | R | A | A | A | A | C | A | A | A | G | G | G | C | A | A | G | R |   |
| A | A | G | G | A | G | G | A | G | A | C | G | G | A | G | G | C | A | G | A | A | A | A | C | A | A | R | R | R | G | G | C | R | A | G | G |

Haplotype

↑  
KCNH4

↑  
WNK4
